# Supplementary material
Source: PubMed Central journal article supplement (PMC6668685)
Supplement: jci-129-127726-s252.pdf [file jci-129-127726-s252.pdf]

## Supplementary information

## Supplemental Figure 1

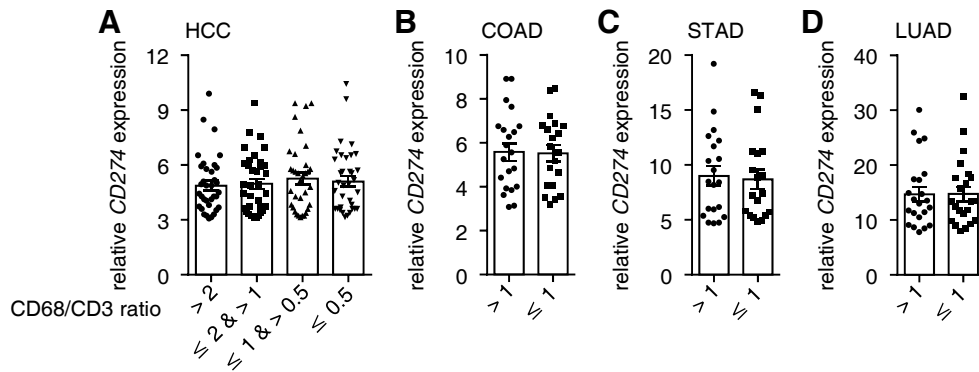

**Supplemental Figure 1. Immune landscapes of PD-L1<sup>high</sup> tumors determine patients' clinical outcomes. (A-D)** CD274 expression in tumor tissues with different patterns of CD3 and CD68 distribution. CD274<sup>high</sup> patients were divided into four groups or two groups according to the ratio of macrophages to CD3<sup>+</sup> T cells in tumor as described in Figure 2, E and H. Data represent mean  $\pm$  SEM.

## Supplemental Figure 2

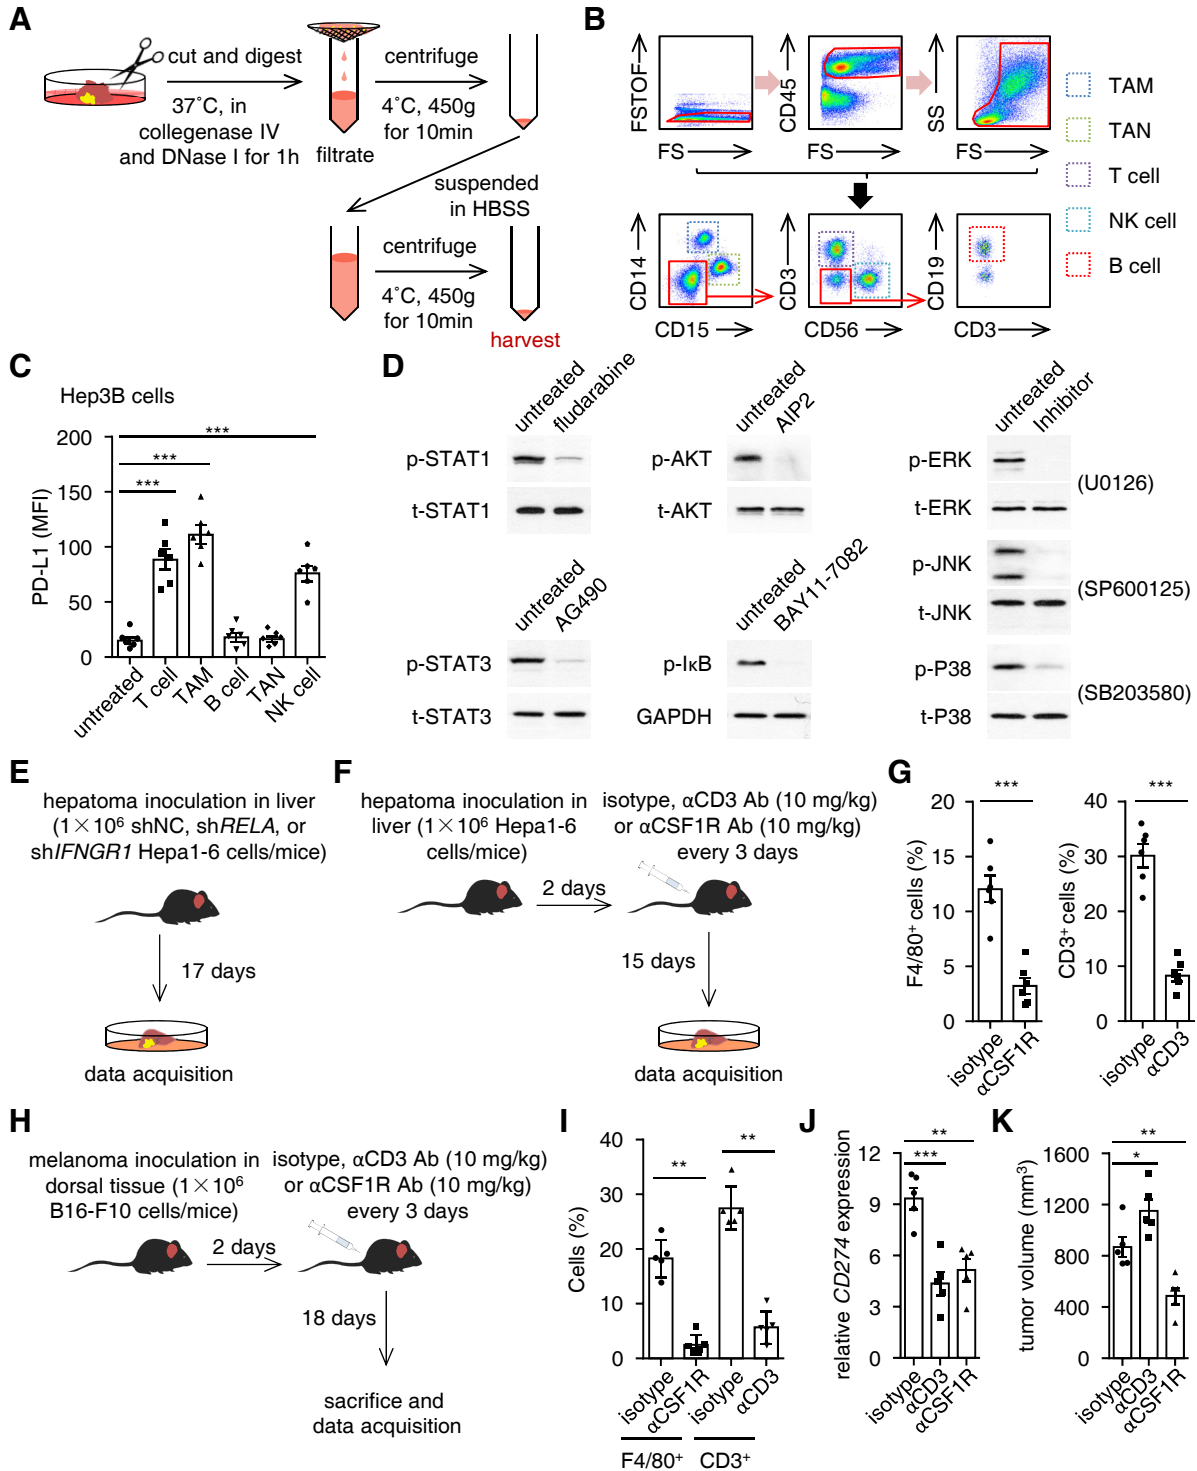

**Supplemental Figure 2. Distinct induction patterns of cancer cell PD-L1 by TAM and T cells.** (A) Procedure for preparing single-cell leukocyte suspensions from human HCC tissue. (B) Gating strategies for FACS analysis and sorting B cells, T cells, NK cells, neutrophils, and macrophages from HCC tissue. Representative plots of cells isolated from tumor tissue showed that mononuclear cells from samples were first gated for singlet (FS-TOF vs. FS) and then for leukocytes (FS vs. CD45 and FS vs. SS), and finally for the indicated marker of specific cell types ( $n = 6$ ). (C) Hep3B cells were left untreated or were incubated with CM from indicated immune cells isolated from HCC tissues. Expression of PD-L1 were determined by FACS on day 3 ( $n = 6$ ). (D) Inhibitory efficiencies of indicated inhibitors on the activation of STAT, MAPK, PI3K, and NF- $\kappa$ B signaling pathways in TIL-CM-treated HepG2 cells. (E) Wild type (shNC), P65 knockdown (shRELA), or IFN- $\gamma$  receptor knockdown (shIFNGR1) Hepa1-6 cells were inoculated in livers of C57BL/6 mice for 17 days as indicated. (F-K) Mice bearing Hepa1-6 hepatoma (F) or B16-F10 melanoma (H) were injected with isotype, anti-CD3 Ab, or anti-CSF1R Ab every 3 day as indicated. Effects of anti-CSF1R and anti-CD3 Abs on the infiltration of macrophages and T cells, respectively, were determined in mouse tumor tissues (G and I,  $n = 6$  for G and  $n = 5$  for I). CD274 expression in tumor tissues (J) and tumor volume (K) of melanoma were analyzed ( $n = 5$ ). Data represent mean  $\pm$  SEM. Results are representative of three separate experiments. \* $P < 0.05$ , \*\* $P < 0.01$ , and \*\*\* $P < 0.001$ , 1-way ANOVA with Dunnett's post-test (C, J, and K) or Student's  $t$  test (G and I).

## Supplemental Figure 3

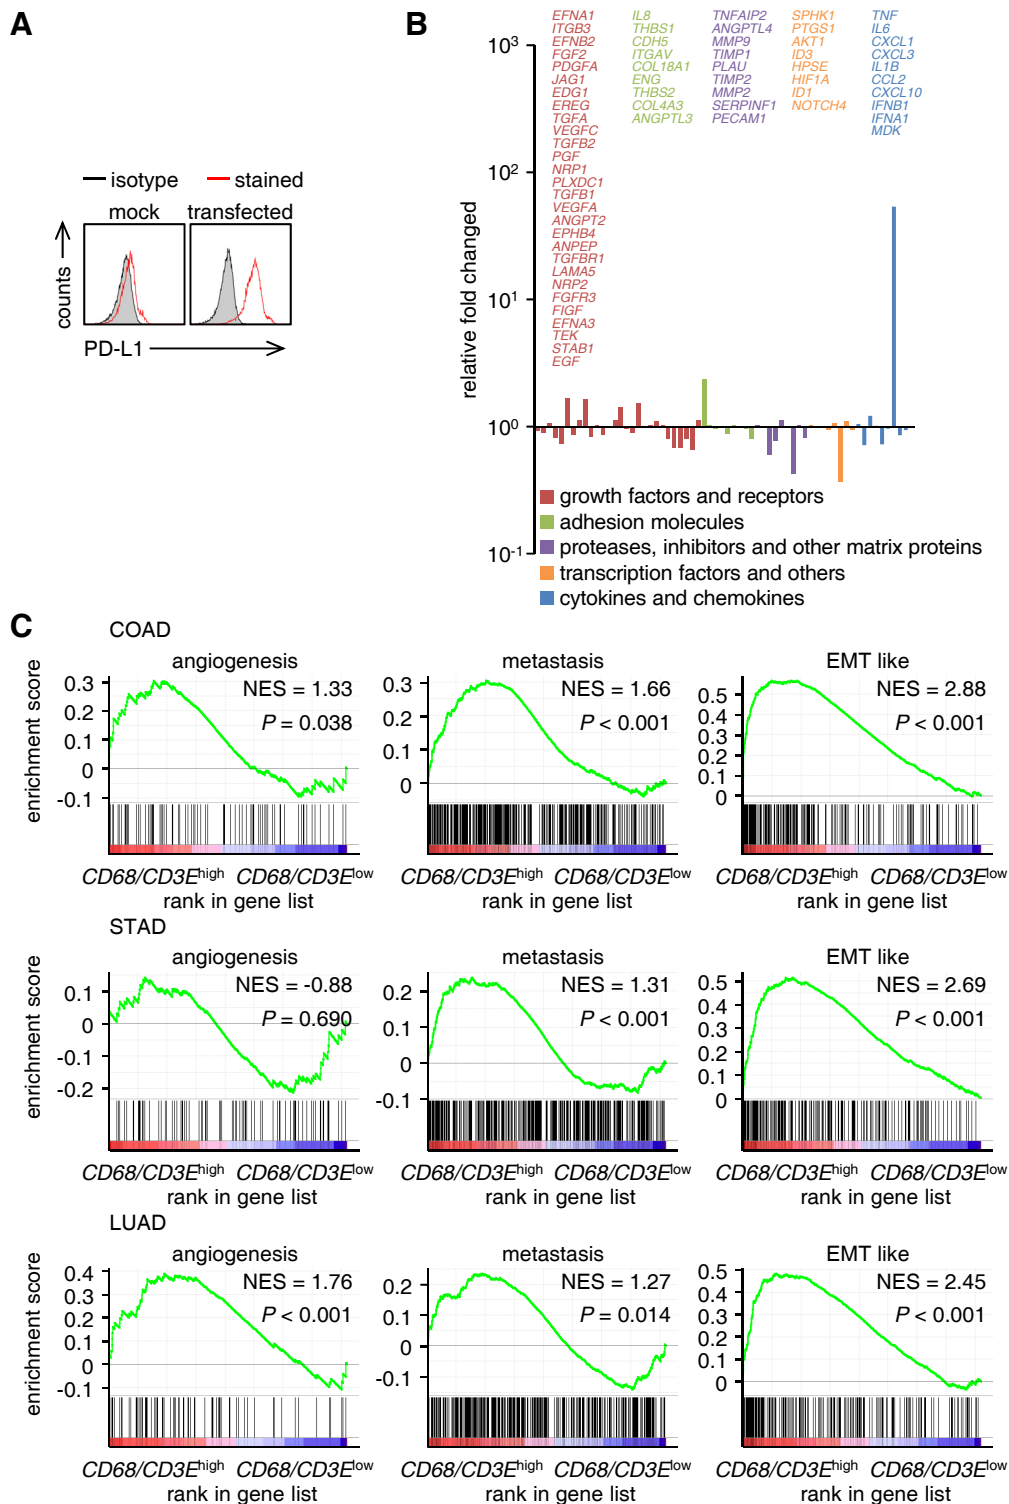

**Supplemental Figure 3. Macrophages and T cells induce PD-L1<sup>+</sup> cancer cells with distinct hallmarks.** (A) FACS analysis of PD-L1 transduction rates in HepG2 cells ( $n = 3$ ). (B) Fold changes of protumorigenic genes mRNA levels in T-cell-CM-generated PD-L1<sup>+</sup> HepG2 cells compared with untreated HepG2 cells were analyzed by SuperArray Real-Time PCR. (C) Gene set enrichment analysis of angiogenesis signature, metastasis signature, and EMT like signature in  $CD68/CD3E^{\text{high}}$  samples versus  $CD68/CD3E^{\text{low}}$  counterparts within  $CD274^{\text{high}}$  COAD, STAD, and LUAD patients from TCGA data set.

## Supplemental Figure 4

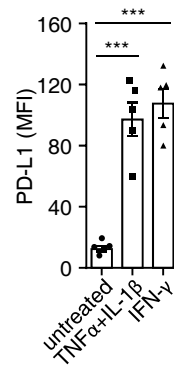

**Supplemental Figure 4. TNF $\alpha$ /IL-1 $\beta$  and IFN- $\gamma$  induce cancer cell PD-L1, respectively.** HepG2 cells were left untreated or were incubated with TNF $\alpha$  plus IL-1 $\beta$  or IFN- $\gamma$ . Expression of PD-L1 were determined by FACS on day 3 ( $n = 5$ ). Data represent mean  $\pm$  SEM. Results are representative of three separate experiments. \*\*\* $P < 0.001$ , 1-way ANOVA with Dunett's post-test.

## Supplemental Figure 5

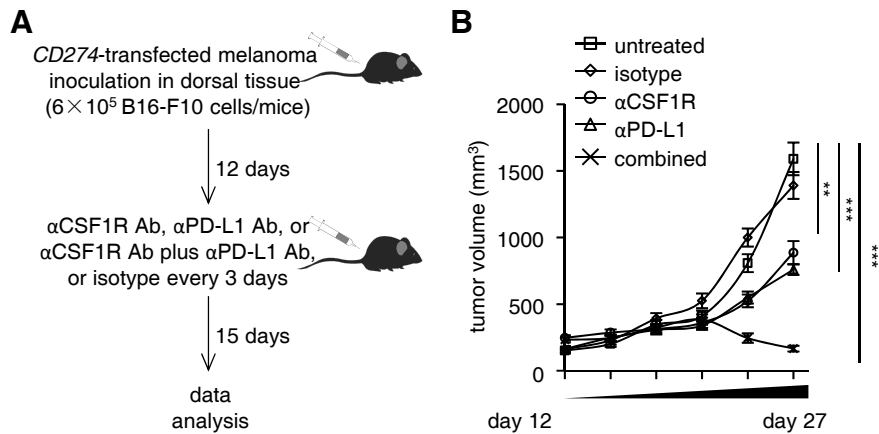

**Supplemental Figure 5. Depleting macrophage augments immunotherapeutic efficacy of a PD-L1 antibody in mice melanoma. (A)** Mice bearing B16-F10 melanoma in dorsal tissues for 12 days were left untreated or were treated with isotype, αCSF1R Ab, αPD-L1 Ab, or αCSF1R Ab plus αPD-L1 Ab as described. **(B)** Tumor sizes over the indicated time were analyzed ( $n = 5$ ). Data represent mean  $\pm$  SEM.  $**P < 0.01$  and  $***P < 0.001$ , 1-way ANOVA with Bonferroni's post-test **(B)**.

**Supplemental Table 1. Clinical characteristics of the 382 HCC patients**

| <b>Patient characteristics</b>         | <b>Cohort 1</b> | <b>Cohort 2</b> |
|----------------------------------------|-----------------|-----------------|
| No. of patients                        | 345             | 37              |
| Age, years (median, range)             | 49, 17–75       | 53, 19–78       |
| Gender (male/female)                   | 308/37          | 31/6            |
| HbsAg (negative/positive)              | 42/303          | 3/34            |
| Cirrhosis (absent/present)             | 68/277          | 15/22           |
| ALT, U/L (median, range)               | 44, 9–1590      | 32.3, 16–108.2  |
| AFP, ng/ml ( $\leq 25$ / $> 25$ )      | 101/244         | 14/23           |
| Tumor size, cm ( $\leq 5$ / $> 5$ )    | 122/223         | 17/20           |
| Tumor multiplicity (solitary/multiple) | 271/74          | 27/10           |
| Vascular invasion (absent/present)     | 311/34          | 29/8            |
| Intrahepatic metastasis (no/yes)       | 283/62          | 37/0            |
| TNM stage (I+II/III+IV)                | 241/104         | 27/10           |
| Tumor differentiation (I+II/III+IV)    | 270/75          | 18/19           |
| Fibrous capsule (absent/present)       | 71/274          | 16/21           |

**Abbreviations:** HbsAg, hepatitis B surface antigen; ALT, alanine aminotransferase; AFP,  $\alpha$ -fetoprotein; TNM, tumor node metastasis.

**Note:** Patients in hepatocellular carcinoma cohort 1 contributed to the paraffin-embedded samples for IHC staining and real time-PCR that were used in analyses of PD-L1 expression, cell distribution, correlation, and patient prognosis; patients in hepatocellular carcinoma cohort 2 contributed fresh samples.



**Supplemental Table 2. Information of tumor samples from TCGA data set**

| <b>Tumor</b>                                                     | <b>Abbreviation</b> | <b>Cohort</b> | <b>Number</b> |
|------------------------------------------------------------------|---------------------|---------------|---------------|
| Adrenocortical carcinoma                                         | ACC                 | Provisional   | 79            |
| Bladder Urothelial Carcinoma                                     | BLCA                | Provisional   | 408           |
| Breast invasive carcinoma                                        | BRCA                | Provisional   | 817           |
| Cervical squamous cell carcinoma and endocervical adenocarcinoma | CESC                | Provisional   | 306           |
| Cholangiocarcinoma                                               | CHOL                | Provisional   | 36            |
| Colon adenocarcinoma                                             | COAD                | Provisional   | 382           |
| Lymphoid Neoplasm Diffuse Large B cell Lymphoma                  | DLBC                | Provisional   | 48            |
| Esophageal carcinoma                                             | ESCA                | Provisional   | 185           |
| Glioblastoma multiforme                                          | GBM                 | Provisional   | 154           |
| Head and Neck squamous cell carcinoma                            | HNSC                | Provisional   | 522           |
| Kidney Chromophobe                                               | KICH                | Provisional   | 66            |
| Kidney renal clear cell carcinoma                                | KIRC                | Provisional   | 534           |
| Kidney renal papillary cell carcinoma                            | KIRP                | Provisional   | 291           |
| Acute Myeloid Leukemia                                           | LAML                | Provisional   | 172           |
| Brain Lower Grade Glioma                                         | LGG                 | Provisional   | 530           |
| Liver hepatocellular carcinoma                                   | HCC                 | Provisional   | 373           |
| Lung adenocarcinoma                                              | LUAD                | Provisional   | 230           |
| Lung squamous cell carcinoma                                     | LUSC                | Provisional   | 501           |
| Mesothelioma                                                     | MESO                | Provisional   | 87            |
| Ovarian serous cystadenocarcinoma                                | OV                  | Provisional   | 307           |
| Pancreatic adenocarcinoma                                        | PAAD                | Provisional   | 179           |
| Pheochromocytoma and Paraganglioma                               | PCPG                | Provisional   | 184           |
| Prostate adenocarcinoma                                          | PRAD                | Provisional   | 498           |
| Sarcoma                                                          | SARC                | Provisional   | 263           |
| Skin Cutaneous Melanoma                                          | SKCM                | Provisional   | 472           |
| Stomach adenocarcinoma                                           | STAD                | Provisional   | 415           |
| Testicular Germ Cell Tumors                                      | TGCT                | Provisional   | 156           |
| Thyroid carcinoma                                                | THCA                | Provisional   | 509           |
| Thymoma                                                          | THYM                | Provisional   | 120           |
| Uterine Corpus Endometrial Carcinoma                             | UCEC                | Provisional   | 177           |
| Uterine Carcinosarcoma                                           | UCS                 | Provisional   | 57            |
| Uveal Melanoma                                                   | UVM                 | Provisional   | 80            |

Supplemental Table 3. Genes used in GSEA analysis

| Tumor necrosis factor signature |                |                 |                |                  |                |                |                |                |                  |
|---------------------------------|----------------|-----------------|----------------|------------------|----------------|----------------|----------------|----------------|------------------|
| <i>ORM1</i>                     | <i>TLR3</i>    | <i>TRIM27</i>   | <i>LGALS9</i>  | <i>WNT5A</i>     | <i>HOY858</i>  | <i>IL12B</i>   | <i>TICAM1</i>  | <i>IFIH1</i>   | <i>THBS1</i>     |
| <i>NOD2</i>                     | <i>CD34</i>    | <i>LEP</i>      | <i>RIPK1</i>   | <i>ISL1</i>      | <i>NLRC3</i>   | <i>UBE2J1</i>  | <i>CYBA</i>    | <i>SLAMF1</i>  | <i>ZBTB20</i>    |
| <i>HMGB1</i>                    | <i>PF4</i>     | <i>LTF</i>      | <i>GAS6</i>    | <i>GPR18</i>     | <i>CLEC4A</i>  | <i>APP</i>     | <i>FCER1G</i>  | <i>CHRNA7</i>  | <i>TNFRSF8</i>   |
| <i>HSF1</i>                     | <i>FOXP3</i>   | <i>CD14</i>     | <i>TLR4</i>    | <i>HLA-E</i>     | <i>PTAFR</i>   | <i>TBC1D23</i> | <i>ACP5</i>    | <i>TIRAP</i>   | <i>ARFGEF2</i>   |
| <i>CCL19</i>                    | <i>CACTIN</i>  | <i>GHSR</i>     | <i>ADIPOQ</i>  | <i>TNFAIP3</i>   | <i>LRRK2</i>   | <i>HDAC2</i>   | <i>CYBB</i>    | <i>HAVCR2</i>  | <i>ARHGEF2</i>   |
| <i>LY96</i>                     | <i>IRAK3</i>   | <i>TWIST1</i>   | <i>ZFP36</i>   | <i>TLR1</i>      | <i>ANGPT1</i>  | <i>CCR2</i>    | <i>HSPB1</i>   | <i>SPN</i>     | <i>TNFRSF11A</i> |
| <i>CD2</i>                      | <i>POMC</i>    | <i>MAVS</i>     | <i>LBP</i>     | <i>ARG2</i>      | <i>CD36</i>    | <i>DHX9</i>    | <i>RARA</i>    | <i>PTPN22</i>  | <i>TNFRSF21</i>  |
| <i>AXL</i>                      | <i>NFKBIL1</i> | <i>FOXP1</i>    | <i>RASGRP1</i> | <i>CCL3</i>      | <i>ZC3H12A</i> | <i>GHRL</i>    | <i>AZU1</i>    | <i>PYCARD</i>  | <i>TNFRSF10D</i> |
| <i>MC1R</i>                     | <i>AKAP8</i>   | <i>GPNMB</i>    | <i>BPI</i>     | <i>DDX58</i>     | <i>CARD9</i>   | <i>NFATC4</i>  | <i>LILRA4</i>  | <i>RIPK2</i>   | <i>MAPKAPK2</i>  |
| <i>DEFB114</i>                  | <i>C5AR2</i>   | <i>ERRFI1</i>   | <i>LILRB1</i>  | <i>SELENOK</i>   | <i>PIK3R1</i>  | <i>IL10</i>    | <i>CLU</i>     | <i>BCL3</i>    | <i>ORM2</i>      |
| <i>SYT11</i>                    | <i>DDT</i>     | <i>NOD1</i>     | <i>ARRB2</i>   | <i>TXNDC17</i>   | <i>SASH3</i>   | <i>IL23A</i>   | <i>AZI2</i>    | <i>TRAIP</i>   | <i>OCSTAMP</i>   |
| <i>HAMP</i>                     | <i>COL1A1</i>  | <i>CLDN18</i>   | <i>TRAF3</i>   | <i>CD40LG</i>    | <i>TNFSF9</i>  | <i>TCL1A</i>   | <i>PLVAP</i>   | <i>ILK</i>     | <i>TNFRSF1A</i>  |
| <i>CCL16</i>                    | <i>CCL25</i>   | <i>TRAF1</i>    | <i>APOB</i>    | <i>SPPL2A</i>    | <i>SPPL2B</i>  | <i>ZNF675</i>  | <i>POSTN</i>   | <i>KARS</i>    | <i>ADAMTS13</i>  |
| <i>CCL24</i>                    | <i>PYDC2</i>   | <i>CASP1</i>    | <i>ENDO G</i>  | <i>TNFRSF6B</i>  | <i>TNFSF8</i>  | <i>CD70</i>    | <i>ICAM1</i>   | <i>ST18</i>    | <i>TNFRSF13C</i> |
| <i>PRKN</i>                     | <i>SNRNP70</i> | <i>CX3CL1</i>   | <i>SLC2A4</i>  | <i>RBCK1</i>     | <i>HMHB1</i>   | <i>VCAM1</i>   | <i>GSDME</i>   | <i>MAP4K3</i>  | <i>EDA2R</i>     |
| <i>CHI3L1</i>                   | <i>IGBP1</i>   | <i>CARD14</i>   | <i>SPHK1</i>   | <i>GPS2</i>      | <i>PIAS4</i>   | <i>PID1</i>    | <i>NGFR</i>    | <i>TANK</i>    | <i>TNFRSF10A</i> |
| <i>CCL17</i>                    | <i>KRT8</i>    | <i>TNFRSF9</i>  | <i>CCL7</i>    | <i>CCL8</i>      | <i>COMMD7</i>  | <i>GATA3</i>   | <i>TAX1BP1</i> | <i>WDR35</i>   | <i>TNFRSF17</i>  |
| <i>TDGF1</i>                    | <i>FABP4</i>   | <i>PCK1</i>     | <i>HYAL2</i>   | <i>IKBKB</i>     | <i>CCDC3</i>   | <i>RELT</i>    | <i>AIM2</i>    | <i>HYAL1</i>   | <i>TNFRSF13B</i> |
| <i>SFRP1</i>                    | <i>PRPF8</i>   | <i>EDAR</i>     | <i>PTK2B</i>   | <i>RPS6KB1</i>   | <i>RPS3</i>    | <i>EDA</i>     | <i>RORA</i>    | <i>ZFP36L1</i> | <i>TNFRSF25</i>  |
| <i>CARD8</i>                    | <i>F2RL1</i>   | <i>UBD</i>      | <i>MYOG</i>    | <i>MYOD1</i>     | <i>CD27</i>    | <i>TNFSF4</i>  | <i>CCL4</i>    | <i>KAT2A</i>   | <i>PPARGC1A</i>  |
| <i>TNFSF11</i>                  | <i>AKT1</i>    | <i>PTGS2</i>    | <i>NFKB1</i>   | <i>GBA</i>       | <i>MAP2K7</i>  | <i>ACOD1</i>   | <i>INPP5K</i>  | <i>ABCC2</i>   | <i>TNFRSF10C</i> |
| <i>CCL21</i>                    | <i>HIPK1</i>   | <i>CCL3L1</i>   | <i>CPNE1</i>   | <i>CIB1</i>      | <i>ZFAND6</i>  | <i>YBX3</i>    | <i>SELE</i>    | <i>CCL22</i>   | <i>TNFRSF19</i>  |
| <i>RFFL</i>                     | <i>GPER1</i>   | <i>HAS2</i>     | <i>TNFRSF4</i> | <i>HIST1H2BJ</i> | <i>AFF3</i>    | <i>MAPK1</i>   | <i>CALCA</i>   | <i>CCL13</i>   | <i>TNFRSF11B</i> |
| <i>CCL11</i>                    | <i>CCL5</i>    | <i>IKBKG</i>    | <i>PYDC1</i>   | <i>LTBR</i>      | <i>NPNT</i>    | <i>RACK1</i>   | <i>SYK</i>     | <i>CD40</i>    | <i>TNFRSF10B</i> |
| <i>MADD</i>                     | <i>FAS</i>     | <i>XCL1</i>     | <i>EDARADD</i> | <i>BRCA1</i>     | <i>TRADD</i>   | <i>NKX3-1</i>  | <i>LTA</i>     | <i>TNF</i>     | <i>ANKRD1</i>    |
| <i>LIMS1</i>                    | <i>PELI3</i>   | <i>BIRC2</i>    | <i>BIRC3</i>   | <i>CDIP1</i>     | <i>ADAM9</i>   | <i>MAP3K5</i>  | <i>GPD1</i>    | <i>TRPV1</i>   | <i>MAP3K14</i>   |
| <i>SMPD4</i>                    | <i>NOL3</i>    | <i>ERBIN</i>    | <i>CCL20</i>   | <i>ADAM17</i>    | <i>GCH1</i>    | <i>FZD5</i>    | <i>CASP8</i>   | <i>HSPA1B</i>  | <i>NLRP2B</i>    |
| <i>PIAS3</i>                    | <i>GBP3</i>    | <i>XCL2</i>     | <i>EDN1</i>    | <i>CARD16</i>    | <i>TMSB4X</i>  | <i>RELA</i>    | <i>NFKBIA</i>  | <i>CXCL8</i>   | <i>TNFRSF14</i>  |
| <i>BAG4</i>                     | <i>KCNJ11</i>  | <i>TNFSF13B</i> | <i>KLF2</i>    | <i>TNFSF15</i>   | <i>CCL18</i>   | <i>CCL23</i>   | <i>ADAM10</i>  | <i>HDAC4</i>   | <i>ADAMTS12</i>  |
| <i>CCL2</i>                     | <i>CASP3</i>   | <i>CLIP3</i>    | <i>CLDN1</i>   | <i>TNFRSF18</i>  | <i>NFE2L2</i>  | <i>GBP2</i>    | <i>SIRT1</i>   | <i>NUB1</i>    | <i>HSPA1A</i>    |
| <i>CASP4</i>                    | <i>TNFSF13</i> | <i>PTPN2</i>    | <i>CCL26</i>   | <i>DAB2IP</i>    | <i>FOXO3</i>   | <i>MAPK14</i>  | <i>KRT18</i>   | <i>IL18BP</i>  | <i>CCL4L1</i>    |

|                |                |                |                |              |               |               |              |             |                  |
|----------------|----------------|----------------|----------------|--------------|---------------|---------------|--------------|-------------|------------------|
| <i>TNFSF14</i> | <i>TNFSF12</i> | <i>MAPK3</i>   | <i>RNF31</i>   | <i>STAT1</i> | <i>CXCL16</i> | <i>CCL14</i>  | <i>OCLN</i>  | <i>CCL1</i> | <i>ADAMTS7</i>   |
| <i>GBP1</i>    | <i>SHARPIN</i> | <i>ZFP36L2</i> | <i>TNFSF18</i> | <i>CYLD</i>  | <i>LTB</i>    | <i>ASS1</i>   | <i>CRHBP</i> | <i>PCK2</i> | <i>TNFRSF1B</i>  |
| <i>CHUK</i>    | <i>TRIM32</i>  | <i>APOA1</i>   | <i>TRAF2</i>   | <i>CEBPA</i> | <i>TSPO</i>   | <i>OTULIN</i> | <i>CCL15</i> | <i>TLR2</i> | <i>TNFRSF12A</i> |
| <i>YTHDC2</i>  | <i>CD58</i>    | <i>DCSTAMP</i> | <i>HYAL3</i>   |              |               |               |              |             |                  |

### Interleukin-1 signature

|                |               |               |               |               |              |               |               |               |                  |
|----------------|---------------|---------------|---------------|---------------|--------------|---------------|---------------|---------------|------------------|
| <i>AES</i>     | <i>IRAK4</i>  | <i>MAPK13</i> | <i>KMO</i>    | <i>UBE2V1</i> | <i>CCL16</i> | <i>CCL25</i>  | <i>ZNF675</i> | <i>TOLLIP</i> | <i>S100A13</i>   |
| <i>MAP3K8</i>  | <i>LGALS9</i> | <i>UBB</i>    | <i>CCL24</i>  | <i>ICAM1</i>  | <i>ST18</i>  | <i>CUL1</i>   | <i>CX3CL1</i> | <i>NOD2</i>   | <i>ADAMTS12</i>  |
| <i>IL1RL2</i>  | <i>CHI3L1</i> | <i>SQSTM1</i> | <i>IGBP1</i>  | <i>OTUD4</i>  | <i>TANK</i>  | <i>PELI3</i>  | <i>CCL17</i>  | <i>CCL7</i>   | <i>RPS6KA4</i>   |
| <i>CYBA</i>    | <i>PCK1</i>   | <i>HYAL2</i>  | <i>IKBKB</i>  | <i>TRIM63</i> | <i>HYAL1</i> | <i>PLCB1</i>  | <i>CD38</i>   | <i>TAB3</i>   | <i>MAP3K3</i>    |
| <i>IL1RN</i>   | <i>EPO</i>    | <i>IL1B</i>   | <i>IL1A</i>   | <i>SFRP1</i>  | <i>YY1</i>   | <i>CCL4</i>   | <i>IL1R1</i>  | <i>RORA</i>   | <i>NFKB1</i>     |
| <i>ANXA1</i>   | <i>ACOD1</i>  | <i>ABCC2</i>  | <i>CCL3L1</i> | <i>MYD88</i>  | <i>PRKCI</i> | <i>SELE</i>   | <i>SOX9</i>   | <i>CCL22</i>  | <i>SLC30A8</i>   |
| <i>CACTIN</i>  | <i>HAS2</i>   | <i>TRAF6</i>  | <i>GCLC</i>   | <i>CCL13</i>  | <i>CCL11</i> | <i>AZU1</i>   | <i>IRAK1</i>  | <i>VRK2</i>   | <i>CITED1</i>    |
| <i>IKBKG</i>   | <i>UPF1</i>   | <i>SKP1</i>   | <i>RPS27A</i> | <i>MAPK11</i> | <i>TAB1</i>  | <i>RC3H1</i>  | <i>XCL1</i>   | <i>NLRP7</i>  | <i>TNFRSF11A</i> |
| <i>IRAK3</i>   | <i>CCL8</i>   | <i>NKX3-1</i> | <i>ANKRD1</i> | <i>HIF1A</i>  | <i>EGR1</i>  | <i>CCL21</i>  | <i>UBE2N</i>  | <i>CCL20</i>  | <i>RPS6KA5</i>   |
| <i>OTUB1</i>   | <i>IRAK2</i>  | <i>GBP3</i>   | <i>TAB2</i>   | <i>XCL2</i>   | <i>EDN1</i>  | <i>RELA</i>   | <i>NFKBIA</i> | <i>CCL3</i>   | <i>ADAMTS7</i>   |
| <i>USP10</i>   | <i>CD40</i>   | <i>ETS1</i>   | <i>BTRC</i>   | <i>IL6</i>    | <i>CXCL8</i> | <i>CCL18</i>  | <i>CCL23</i>  | <i>HDAC4</i>  | <i>ZC3H12A</i>   |
| <i>CCL2</i>    | <i>UBA52</i>  | <i>PRKCA</i>  | <i>RBX1</i>   | <i>GBP2</i>   | <i>TNIP2</i> | <i>RIPK2</i>  | <i>CCL26</i>  | <i>DAB2IP</i> | <i>CEACAM1</i>   |
| <i>IL17A</i>   | <i>CCL5</i>   | <i>PELI1</i>  | <i>SNCA</i>   | <i>CCL4L1</i> | <i>TFPI</i>  | <i>UBC</i>    | <i>MAPK3</i>  | <i>IL1R2</i>  | <i>PYCARD</i>    |
| <i>MTHFR</i>   | <i>PTGIS</i>  | <i>TAF9</i>   | <i>CCL14</i>  | <i>CCL1</i>   | <i>CEBPB</i> | <i>GBP1</i>   | <i>RBMX</i>   | <i>MYLK3</i>  | <i>HYAL3</i>     |
| <i>SRC</i>     | <i>FGG</i>    | <i>FGB</i>    | <i>CCL19</i>  | <i>NOD1</i>   | <i>CCL15</i> | <i>KLF2</i>   | <i>YTHDC2</i> | <i>FBXW11</i> | <i>CASP1</i>     |
| <i>IL1RAP</i>  | <i>JAK2</i>   | <i>GSTP1</i>  | <i>NLRP3</i>  | <i>NLRP2</i>  | <i>PANX1</i> | <i>ORM1</i>   | <i>WNT5A</i>  | <i>PYDC2</i>  | <i>CHRNA7</i>    |
| <i>PML</i>     | <i>ISL1</i>   | <i>SPHK1</i>  | <i>CMA1</i>   | <i>HMGB1</i>  | <i>AIM2</i>  | <i>NLRC4</i>  | <i>SUCNR1</i> | <i>NLRP1</i>  | <i>P2RX7</i>     |
| <i>INAVA</i>   | <i>CARD8</i>  | <i>F2RL1</i>  | <i>TLR4</i>   | <i>F2R</i>    | <i>ACP5</i>  | <i>S1PR3</i>  | <i>CPTP</i>   | <i>GHSR</i>   | <i>NLRP2B</i>    |
| <i>TNFAIP3</i> | <i>TLR8</i>   | <i>PYDC1</i>  | <i>HSPB1</i>  | <i>MEFV</i>   | <i>FZD5</i>  | <i>ARG2</i>   | <i>CD36</i>   | <i>GBP5</i>   | <i>MAP3K7</i>    |
| <i>NLRP12</i>  | <i>CARD18</i> | <i>TRIM16</i> | <i>SMAD3</i>  | <i>CARD16</i> | <i>FOXP1</i> | <i>ABCA1</i>  | <i>GHRL</i>   | <i>MR1</i>    | <i>NLRP10</i>    |
| <i>CARD17</i>  | <i>ERRF1</i>  | <i>TLR6</i>   | <i>CCR7</i>   | <i>IFI16</i>  | <i>ORM2</i>  | <i>APOA1</i>  | <i>GSDMD</i>  | <i>ARRB2</i>  | <i>GAS6</i>      |
| <i>IGHD</i>    | <i>PELI2</i>  | <i>SAA1</i>   | <i>NR1H4</i>  | <i>CHUK</i>   | <i>HDAC2</i> | <i>HAVCR2</i> | <i>IL10</i>   |               |                  |

### Angiogenesis

|              |               |                |               |               |              |               |                |                |                 |
|--------------|---------------|----------------|---------------|---------------|--------------|---------------|----------------|----------------|-----------------|
| <i>ABL1</i>  | <i>ACVRL1</i> | <i>ADAMTS9</i> | <i>ADGRA2</i> | <i>AGTR1</i>  | <i>AKT3</i>  | <i>ANGPT1</i> | <i>ANXA1</i>   | <i>APELA</i>   | <i>APLNR</i>    |
| <i>BMP4</i>  | <i>BMPER</i>  | <i>CARD10</i>  | <i>CCBE1</i>  | <i>CDC42</i>  | <i>CDH13</i> | <i>CIB1</i>   | <i>CLEC14A</i> | <i>CREB3L1</i> | <i>DLL1</i>     |
| <i>DLL4</i>  | <i>E2F2</i>   | <i>E2F7</i>    | <i>E2F8</i>   | <i>EFNB2</i>  | <i>EGR3</i>  | <i>ENG</i>    | <i>EPHA2</i>   | <i>EPHB4</i>   | <i>EPN1</i>     |
| <i>EPN2</i>  | <i>ESM1</i>   | <i>FGF1</i>    | <i>FGF2</i>   | <i>FGFBP1</i> | <i>FLT4</i>  | <i>FOXC2</i>  | <i>GATA2</i>   | <i>GHRL</i>    | <i>GHSR</i>     |
| <i>GPLD1</i> | <i>GREM1</i>  | <i>HDAC5</i>   | <i>HDAC7</i>  | <i>HDAC9</i>  | <i>HMOX1</i> | <i>IL10</i>   | <i>ITGA5</i>   | <i>ITGB1</i>   | <i>ITGB1BP1</i> |

|               |               |              |                |                |                 |               |               |               |               |
|---------------|---------------|--------------|----------------|----------------|-----------------|---------------|---------------|---------------|---------------|
| <i>JAK1</i>   | <i>JCAD</i>   | <i>JMJD6</i> | <i>KDR</i>     | <i>KLF2</i>    | <i>KLF4</i>     | <i>LEF1</i>   | <i>LOXL2</i>  | <i>MAP2K5</i> | <i>MAP3K3</i> |
| <i>MEOX2</i>  | <i>MMRN2</i>  | <i>NGFR</i>  | <i>NOTCH1</i>  | <i>NR2E1</i>   | <i>NR4A1</i>    | <i>NRARP</i>  | <i>NRP1</i>   | <i>OTULIN</i> | <i>PARVA</i>  |
| <i>PDCD10</i> | <i>PDPK1</i>  | <i>PGF</i>   | <i>PIK3C2A</i> | <i>PLK2</i>    | <i>PPP1R16B</i> | <i>PTGS2</i>  | <i>PTK2B</i>  | <i>RAMP2</i>  | <i>RHOA</i>   |
| <i>RHOJ</i>   | <i>RNF213</i> | <i>ROBO1</i> | <i>RSPO3</i>   | <i>S100A1</i>  | <i>SEMA3E</i>   | <i>SEMA5A</i> | <i>SEMA6A</i> | <i>SLIT2</i>  | <i>SMAD1</i>  |
| <i>SPRED1</i> | <i>SRF</i>    | <i>SRPX2</i> | <i>STARD13</i> | <i>SYNJ2BP</i> | <i>TBXA2R</i>   | <i>TDGF1</i>  | <i>TEK</i>    | <i>THBS1</i>  | <i>VEGFA</i>  |
| <i>VEGFB</i>  | <i>VEGFC</i>  | <i>VEGFD</i> |                |                |                 |               |               |               |               |

---

### **Metastasis**

---

|                     |                  |                  |                  |                  |                 |                 |                     |                     |                     |
|---------------------|------------------|------------------|------------------|------------------|-----------------|-----------------|---------------------|---------------------|---------------------|
| <i>ACTN4</i>        | <i>ADAM33</i>    | <i>ADAMTS5</i>   | <i>ADSL</i>      | <i>AEBP1</i>     | <i>AGRN</i>     | <i>AGTRAP</i>   | <i>AKR1B10</i>      | <i>ALPK3</i>        | <i>AMMECR1</i>      |
| <i>ANKRD10</i>      | <i>ANKRD52</i>   | <i>ANXA2</i>     | <i>AP1S2</i>     | <i>ARFGAP1</i>   | <i>ARG2</i>     | <i>ARHGEF2</i>  | <i>ARNTL2</i>       | <i>ASAP1</i>        | <i>ASNS</i>         |
| <i>ASPH</i>         | <i>ASRGL1</i>    | <i>ATAD2</i>     | <i>ATIC</i>      | <i>B3GALNT1</i>  | <i>B3GAT3</i>   | <i>B3GNT5</i>   | <i>BAMBI</i>        | <i>BARD1</i>        | <i>BCAS4</i>        |
| <i>BCAT1</i>        | <i>BCL11A</i>    | <i>BOP1</i>      | <i>BRD9</i>      | <i>BUB1B</i>     | <i>C11orf49</i> | <i>C12orf49</i> | <i>C18orf54</i>     | <i>C19orf2</i>      | <i>C1orf144</i>     |
| <i>C3orf14</i>      | <i>C4orf48</i>   | <i>C8orf59</i>   | <i>C9orf30</i>   | <i>C9orf86</i>   | <i>CA12</i>     | <i>CABYR</i>    | <i>CAPG</i>         | <i>CBFA2T2</i>      | <i>CBX2</i>         |
| <i>CBX5</i>         | <i>CBX6</i>      | <i>CCDC165</i>   | <i>CCDC64</i>    | <i>CCDC93</i>    | <i>CCDC97</i>   | <i>CD109</i>    | <i>CD24</i>         | <i>CDC7</i>         | <i>CDCA7</i>        |
| <i>CDCA7L</i>       | <i>CDK13</i>     | <i>CDKN1C</i>    | <i>CENPM</i>     | <i>CHD7</i>      | <i>CHFR</i>     | <i>CHML</i>     | <i>CHTF18</i>       | <i>CIB2</i>         | <i>CKAP4</i>        |
| <i>CLN6</i>         | <i>CLTB</i>      | <i>COL1A2</i>    | <i>COLEC12</i>   | <i>COX5B</i>     | <i>CPSF1</i>    | <i>CREB3L1</i>  | <i>CSNK1E</i>       | <i>CTHRC1</i>       | <i>CTNND2</i>       |
| <i>DDHD1</i>        | <i>DDIT4</i>     | <i>DDOST</i>     | <i>DDX25</i>     | <i>DEAF1</i>     | <i>DEF6</i>     | <i>DENND1A</i>  | <i>DENR</i>         | <i>DGKZ</i>         | <i>DHRS13</i>       |
| <i>DKK1</i>         | <i>DLG5</i>      | <i>DLGAP4</i>    | <i>DMKN</i>      | <i>DNAJA4</i>    | <i>DNAJC10</i>  | <i>DPP3</i>     | <i>DTNA</i>         | <i>DTNBP1</i>       | <i>DTYMK</i>        |
| <i>DUSP22</i>       | <i>DUSP9</i>     | <i>E2F1</i>      | <i>ECT2</i>      | <i>EHD2</i>      | <i>ENAH</i>     | <i>ENO2</i>     | <i>EZH2</i>         | <i>FABP5</i>        | <i>FAM110A</i>      |
| <i>FAM129B</i>      | <i>FAM171B</i>   | <i>FAM50A</i>    | <i>FAM58A</i>    | <i>FARP1</i>     | <i>FBLIM1</i>   | <i>FBLN1</i>    | <i>FBXO41</i>       | <i>FBXW12</i>       | <i>FERMT1</i>       |
| <i>FLCN</i>         | <i>FLJ33996</i>  | <i>FLJ43489</i>  | <i>FLNA</i>      | <i>FNDC3B</i>    | <i>FOXM1</i>    | <i>FOXO6</i>    | <i>FOXQ1</i>        | <i>G6PD</i>         | <i>GAPDHP62</i>     |
| <i>GAS2L3</i>       | <i>GAS5</i>      | <i>GBP2</i>      | <i>GCNT3</i>     | <i>GDI1</i>      | <i>GLDN</i>     | <i>GNB2L1</i>   | <i>GNG4</i>         | <i>GNPDA1</i>       | <i>GORAB</i>        |
| <i>GPR107</i>       | <i>GPR172A</i>   | <i>GPRC5B</i>    | <i>GPX8</i>      | <i>GTPBP1</i>    | <i>GTSE1</i>    | <i>GXYLT2</i>   | <i>GYG1</i>         | <i>HDAC1</i>        | <i>HEATR7A</i>      |
| <i>HES4</i>         | <i>HIC2</i>      | <i>HKDC1</i>     | <i>HLA-DQA1</i>  | <i>HMGA1</i>     | <i>HMGB3</i>    | <i>HOXA5</i>    | <i>HOXD8</i>        | <i>HPS1</i>         | <i>HRAS</i>         |
| <i>HYOU1</i>        | <i>IFRD1</i>     | <i>IGF2BP2</i>   | <i>IGF2BP3</i>   | <i>IGSF3</i>     | <i>IKZF4</i>    | <i>INTS8</i>    | <i>IPPK</i>         | <i>ITPR3</i>        | <i>JMY</i>          |
| <i>JRK</i>          | <i>KCNH2</i>     | <i>KCNQ1</i>     | <i>KCTD2</i>     | <i>KIAA0090</i>  | <i>KIAA0101</i> | <i>KIAA1244</i> | <i>KIAA1522</i>     | <i>KIAA1919</i>     | <i>KIF18B</i>       |
| <i>KIF2A</i>        | <i>KIFC2</i>     | <i>KLHL29</i>    | <i>KRT23</i>     | <i>LASP1</i>     | <i>LIMK2</i>    | <i>LLGL1</i>    | <i>LOC100216479</i> | <i>LOC100288911</i> | <i>LOC100506935</i> |
| <i>LOC100507392</i> | <i>LOC155060</i> | <i>LOC286437</i> | <i>LOC440416</i> | <i>LOC727820</i> | <i>LOC92659</i> | <i>LRP11</i>    | <i>LRPPRC</i>       | <i>LRRC16A</i>      | <i>LUZP1</i>        |
| <i>MALAT1</i>       | <i>MAP1B</i>     | <i>MAP2</i>      | <i>MAP3K4</i>    | <i>MAP4</i>      | <i>MAP4K4</i>   | <i>MAP7D2</i>   | <i>MAPK13</i>       | <i>MBNL1</i>        | <i>MCAM</i>         |
| <i>MCOLN3</i>       | <i>MEAF6</i>     | <i>MECOM</i>     | <i>MEP1A</i>     | <i>MFSD10</i>    | <i>MICALL1</i>  | <i>MMD</i>      | <i>MMP11</i>        | <i>MMP12</i>        | <i>MORC2</i>        |
| <i>MPHOSPH9</i>     | <i>MRS2</i>      | <i>MRTO4</i>     | <i>MTHFD1L</i>   | <i>MXD1</i>      | <i>MYBL2</i>    | <i>MYEF2</i>    | <i>MYLIP</i>        | <i>N4BP2L2</i>      | <i>NACA</i>         |
| <i>NAV3</i>         | <i>NDE1</i>      | <i>NEIL3</i>     | <i>NETO2</i>     | <i>NFKBIB</i>    | <i>NLN</i>      | <i>NOL3</i>     | <i>NPAS2</i>        | <i>NPNT</i>         | <i>NQO1</i>         |
| <i>NSMAF</i>        | <i>NUB1</i>      | <i>NUDT14</i>    | <i>NUF2</i>      | <i>NUMBL</i>     | <i>NUP43</i>    | <i>NUPR1</i>    | <i>OLA1</i>         | <i>PACSIN2</i>      | <i>PAFAH1B3</i>     |
| <i>PAM</i>          | <i>PAQR5</i>     | <i>PCNXL3</i>    | <i>PCSK5</i>     | <i>PDCD2</i>     | <i>PDE4C</i>    | <i>PDK1</i>     | <i>PDZK1IP1</i>     | <i>PES1</i>         | <i>PFKFB4</i>       |

|                 |                 |                 |                 |                 |                  |                 |                  |                  |                |
|-----------------|-----------------|-----------------|-----------------|-----------------|------------------|-----------------|------------------|------------------|----------------|
| <i>PGF</i>      | <i>PHF19</i>    | <i>PHF21A</i>   | <i>PHPT1</i>    | <i>PKIB</i>     | <i>PKM2</i>      | <i>PKP4</i>     | <i>PLAG1</i>     | <i>PLAGL1</i>    | <i>PLBD2</i>   |
| <i>PLCB1</i>    | <i>PLD1</i>     | <i>PLXNA1</i>   | <i>PLXNC1</i>   | <i>PNKP</i>     | <i>POMZP3</i>    | <i>POPDC3</i>   | <i>POU2AF1</i>   | <i>PPIL2</i>     | <i>PPM1F</i>   |
| <i>PRPF31</i>   | <i>PRR11</i>    | <i>PRRC2A</i>   | <i>PRRC2B</i>   | <i>PSMC3IP</i>  | <i>PTGES</i>     | <i>PTGFRN</i>   | <i>PTGR1</i>     | <i>PTPN14</i>    | <i>PTPRM</i>   |
| <i>PURB</i>     | <i>PUSL1</i>    | <i>PWWP2B</i>   | <i>PYCLL</i>    | <i>RAB3GAP2</i> | <i>RAD54B</i>    | <i>RAVER1</i>   | <i>RBBP4</i>     | <i>RBM10</i>     | <i>RCAN3</i>   |
| <i>RCC2</i>     | <i>REXO4</i>    | <i>RHOBTB1</i>  | <i>RNF145</i>   | <i>RRAS</i>     | <i>RRP12</i>     | <i>RRP7A</i>    | <i>RUVBL2</i>    | <i>SAC3D1</i>    | <i>SBNO1</i>   |
| <i>SCAMP5</i>   | <i>SCRIB</i>    | <i>SEMA3F</i>   | <i>SEP9</i>     | <i>SERINC2</i>  | <i>SERPINB1</i>  | <i>SERPINE2</i> | <i>SERPINH1</i>  | <i>SESTD1</i>    | <i>SF3A2</i>   |
| <i>SHC1</i>     | <i>SHKBP1</i>   | <i>SLC16A7</i>  | <i>SLC22A15</i> | <i>SLC25A19</i> | <i>SLC25A24</i>  | <i>SLC25A29</i> | <i>SLC25A36</i>  | <i>SLC2A6</i>    | <i>SLC36A1</i> |
| <i>SLC39A10</i> | <i>SLC39A4</i>  | <i>SLC44A3</i>  | <i>SLC45A4</i>  | <i>SLC6A8</i>   | <i>SLC7A11</i>   | <i>SMG5</i>     | <i>SMOX</i>      | <i>SMPD2</i>     | <i>SNAP25</i>  |
| <i>SNAPC4</i>   | <i>SNRNP48</i>  | <i>SNRPA</i>    | <i>SNRPN</i>    | <i>SOHLH2</i>   | <i>SORT1</i>     | <i>SOX4</i>     | <i>SOX9</i>      | <i>SPAG4</i>     | <i>SPINK1</i>  |
| <i>SPINT1</i>   | <i>SPON2</i>    | <i>SSBP4</i>    | <i>ST14</i>     | <i>STK39</i>    | <i>STOX2</i>     | <i>STRBP</i>    | <i>SULT1C2</i>   | <i>SURF2</i>     | <i>SUSD4</i>   |
| <i>TAF3</i>     | <i>TAX1BP3</i>  | <i>TBC1D13</i>  | <i>TCF3</i>     | <i>TCIRG1</i>   | <i>TDG</i>       | <i>TEAD2</i>    | <i>TECPR1</i>    | <i>TGFB2</i>     | <i>THEM4</i>   |
| <i>TKT</i>      | <i>TMCC1</i>    | <i>TMCO4</i>    | <i>TMED9</i>    | <i>TMEM165</i>  | <i>TMEM194A</i>  | <i>TMEM237</i>  | <i>TMF1</i>      | <i>TMSB10</i>    | <i>TNIP2</i>   |
| <i>TNPO1</i>    | <i>TOB2</i>     | <i>TOX3</i>     | <i>TPD52L2</i>  | <i>TRAF5</i>    | <i>TRAPPC4</i>   | <i>TRIP10</i>   | <i>TRIP13</i>    | <i>TRPC1</i>     | <i>TRPS1</i>   |
| <i>TSHZ2</i>    | <i>TSSC4</i>    | <i>TTLL7</i>    | <i>TUBB2A</i>   | <i>TUFT1</i>    | <i>TWIST1</i>    | <i>UBAP2</i>    | <i>UBAP2L</i>    | <i>UBE2O</i>     | <i>UBE2Q2</i>  |
| <i>UPF3B</i>    | <i>URB2</i>     | <i>USP34</i>    | <i>USP42</i>    | <i>USP48</i>    | <i>VANGL1</i>    | <i>VCAN</i>     | <i>VGLL4</i>     | <i>VSIG10L</i>   | <i>WDFY2</i>   |
| <i>WDR5</i>     | <i>WDR54</i>    | <i>WFIKKN1</i>  | <i>WHSC1</i>    | <i>YARS</i>     | <i>ZC3H3</i>     | <i>ZCCHC7</i>   | <i>ZDHHC24</i>   | <i>ZFP41</i>     | <i>ZIC2</i>    |
| <i>ZMYM3</i>    | <i>ZMYND19</i>  | <i>ZNF234</i>   | <i>ZNF239</i>   | <i>ZNF432</i>   | <i>ZNF532</i>    | <i>ZNF618</i>   | <i>ZNF704</i>    | <i>ZNF721</i>    | <i>ZNF765</i>  |
| <i>ZNF777</i>   | <i>ZNF789</i>   | <i>ARHGEF1</i>  | <i>ATXN2L</i>   | <i>BIRC5</i>    | <i>C20orf194</i> | <i>CARD8</i>    | <i>CCNE1</i>     | <i>CHD2</i>      | <i>RAPGEF1</i> |
| <i>COL1A1</i>   | <i>EFCAB2</i>   | <i>GNAS</i>     | <i>ITGA2</i>    | <i>MAGEA1</i>   | <i>NEAT1</i>     | <i>PIGT</i>     | <i>RRAGD</i>     | <i>DBN1</i>      | <i>FAM199X</i> |
| <i>GRK6</i>     | <i>KIAA0513</i> | <i>MARS</i>     | <i>NRP1</i>     | <i>PLP2</i>     | <i>SEMA3C</i>    | <i>DGCR2</i>    | <i>FIGN</i>      | <i>HJURP</i>     | <i>LAMB1</i>   |
| <i>MKNK1</i>    | <i>OTUD3</i>    | <i>PPP2R4</i>   | <i>SH2B1</i>    | <i>DNM1L</i>    | <i>FXYD3</i>     | <i>HUNK</i>     | <i>LOC286052</i> | <i>MTMR2</i>     | <i>PDIA4</i>   |
| <i>PTP4A3</i>   | <i>SLC2A1</i>   | <i>TMEM201</i>  | <i>TRABD</i>    | <i>TTLL4</i>    | <i>UCP2</i>      | <i>VSIG10</i>   | <i>ZCCHC17</i>   | <i>ZNF302</i>    | <i>ALDOA</i>   |
| <i>ALDH18A1</i> | <i>CAPN10</i>   | <i>DGCR14</i>   | <i>FUS</i>      | <i>IRAK1</i>    | <i>MAPK3</i>     | <i>ORAI2</i>    | <i>PTMA</i>      | <i>ARHGAP4</i>   | <i>CCL28</i>   |
| <i>DNAJC6</i>   | <i>GLS</i>      | <i>KIAA0485</i> | <i>MIR210HG</i> | <i>PDGFA</i>    | <i>RAD54L</i>    | <i>ATP13A2</i>  | <i>CEP164</i>    | <i>EEF1A2</i>    | <i>GRAMD1A</i> |
| <i>LAMA5</i>    | <i>MTHFD2</i>   | <i>PIDD</i>     | <i>ROBO1</i>    | <i>BCORL1</i>   | <i>COL11A2</i>   | <i>FAM178A</i>  | <i>HIF1AN</i>    | <i>LOC283508</i> | <i>NDOR1</i>   |
| <i>PLEKHG2</i>  | <i>SELM</i>     | <i>C1orf93</i>  | <i>CTSC</i>     | <i>FHOD3</i>    | <i>HSPBAP1</i>   | <i>MACROD2</i>  | <i>NRCAM</i>     | <i>PPP1R9A</i>   | <i>SGSH</i>    |
| <i>SLC29A4</i>  | <i>SLFN13</i>   | <i>SOAT1</i>    | <i>SPTBN1</i>   | <i>SYNCRIP</i>  | <i>TFAP2C</i>    | <i>TMEM200B</i> | <i>TPM2</i>      | <i>TSTA3</i>     | <i>UCHL1</i>   |
| <i>VPS13C</i>   | <i>ZC3HAV1</i>  | <i>ZNF292</i>   | <i>ZNF827</i>   | <i>SMARCE1</i>  | <i>SOCS7</i>     | <i>SSBP2</i>    | <i>TACC3</i>     | <i>TFPT</i>      |                |

---

**EMT like**


---

|              |               |                 |              |              |             |              |               |              |               |
|--------------|---------------|-----------------|--------------|--------------|-------------|--------------|---------------|--------------|---------------|
| <i>TGFBI</i> | <i>IGFBP3</i> | <i>MMP1</i>     | <i>ITGB1</i> | <i>LAMC2</i> | <i>PDPN</i> | <i>TNC</i>   | <i>LAMB3</i>  | <i>VIM</i>   | <i>CA9</i>    |
| <i>LAMA3</i> | <i>ITGA6</i>  | <i>COL17A1</i>  | <i>CD99</i>  | <i>PTHLH</i> | <i>GJA1</i> | <i>LTBP1</i> | <i>ITGB6</i>  | <i>LIMA1</i> | <i>DNAJC3</i> |
| <i>ITGA5</i> | <i>ODC1</i>   | <i>SERPINE2</i> | <i>AREG</i>  | <i>BNIP3</i> | <i>MMP3</i> | <i>P4HA1</i> | <i>SLC2A1</i> | <i>FHL2</i>  | <i>EDN1</i>   |
| <i>SDC1</i>  | <i>PRSS23</i> | <i>NPNT</i>     | <i>RAMP1</i> | <i>CDH13</i> | <i>DST</i>  | <i>MMP2</i>  | <i>ITGB4</i>  | <i>PTK7</i>  | <i>CTSA</i>   |

|                |                 |                 |                 |                 |                  |                     |                 |                  |                |
|----------------|-----------------|-----------------|-----------------|-----------------|------------------|---------------------|-----------------|------------------|----------------|
| <i>AKR1C1</i>  | <i>DLK2</i>     | <i>PXN</i>      | <i>LEPREL1</i>  | <i>PSMD2</i>    | <i>PFN2</i>      | <i>CSRP2</i>        | <i>SLC16A1</i>  | <i>PFKP</i>      | <i>CNN3</i>    |
| <i>MMP10</i>   | <i>INHBA</i>    | <i>KRT6B</i>    | <i>MMP9</i>     | <i>G0S2</i>     | <i>CDH1</i>      | <i>SPRR1B</i>       | <i>ECM1</i>     | <i>CD68</i>      | <i>C14orf1</i> |
| <i>HTRA1</i>   | <i>SQRDL</i>    | <i>P4HA2</i>    | <i>F3</i>       | <i>TMEM154</i>  | <i>CYB5R1</i>    | <i>LOC100862671</i> | <i>IL1RN</i>    | <i>FEZ1</i>      | <i>SLC39A1</i> |
| <i>KYNU</i>    | <i>GJB5</i>     | <i>DHCR7</i>    | <i>MBOAT2</i>   | <i>MEG3</i>     | <i>EMP3</i>      | <i>DSC2</i>         | <i>SDC4</i>     | <i>UAP1</i>      | <i>EFEMP1</i>  |
| <i>DHRS7</i>   | <i>OPTN</i>     | <i>COL4A2</i>   | <i>ANXA3</i>    | <i>AHNAK2</i>   | <i>ANXA8</i>     | <i>HERPUD1</i>      | <i>CD40</i>     | <i>SERINC1</i>   | <i>DFNA5</i>   |
| <i>FN1</i>     | <i>CLU</i>      | <i>COL1A1</i>   | <i>TAGLN</i>    | <i>AXL</i>      | <i>KRT8</i>      | <i>CTHRC1</i>       | <i>TMEM45A</i>  | <i>LEPRE1</i>    | <i>RAP1B</i>   |
| <i>MUL1</i>    | <i>FRMD6</i>    | <i>MAGED1</i>   | <i>CTSL1</i>    | <i>GADD45B</i>  | <i>CTGF</i>      | <i>KDELR3</i>       | <i>CDH11</i>    | <i>SLC31A2</i>   | <i>TGM2</i>    |
| <i>COL5A2</i>  | <i>CXCL13</i>   | <i>AMTN</i>     | <i>TCF25</i>    | <i>IL32</i>     | <i>LINC00152</i> | <i>GLIPR1</i>       | <i>TMEM40</i>   | <i>HIST1H2BG</i> | <i>PDLIM7</i>  |
| <i>SPATA20</i> | <i>IGFL2</i>    | <i>GALNT2</i>   | <i>RALA</i>     | <i>FSTL1</i>    | <i>NIPSNAP1</i>  | <i>SEMA3C</i>       | <i>CDKN1A</i>   | <i>DSG2</i>      | <i>PRSS8</i>   |
| <i>MFSD1</i>   | <i>LGALS1</i>   | <i>NNMT</i>     | <i>SERPING1</i> | <i>IGFBP7</i>   | <i>C1S</i>       | <i>CD74</i>         | <i>SERPINF1</i> | <i>SPARC</i>     | <i>RAB8A</i>   |
| <i>IFITM2</i>  | <i>C1R</i>      | <i>S100A4</i>   | <i>ANGPTL4</i>  | <i>GPX3</i>     | <i>GSTA1</i>     | <i>SAT1</i>         | <i>SPP1</i>     | <i>CCL2</i>      | <i>MAPRE1</i>  |
| <i>S100A16</i> | <i>MT2A</i>     | <i>TIMP3</i>    | <i>TPPP3</i>    | <i>MYADM</i>    | <i>PLIN2</i>     | <i>SPARCL1</i>      | <i>LSP1</i>     | <i>TSPAN4</i>    | <i>ERGIC2</i>  |
| <i>SMIM3</i>   | <i>SERPINA3</i> | <i>CYR61</i>    | <i>ADAMTS1</i>  | <i>SELM</i>     | <i>MLKL</i>      | <i>NDUFAF3</i>      | <i>LUM</i>      | <i>NMRK1</i>     | <i>GLB1</i>    |
| <i>TIMP1</i>   | <i>TMEM179B</i> | <i>CXCL14</i>   | <i>DKK3</i>     | <i>SERPINH1</i> | <i>PRKCDBP</i>   | <i>BGN</i>          | <i>SLC7A8</i>   | <i>SLC38A5</i>   | <i>TSR2</i>    |
| <i>KLK5</i>    | <i>THBS2</i>    | <i>CAV1</i>     | <i>CXCR7</i>    | <i>ADM</i>      | <i>ANXA5</i>     | <i>FSTL3</i>        | <i>PLEK2</i>    | <i>TNFRSF12A</i> | <i>IL1R2</i>   |
| <i>IGFBP6</i>  | <i>SLC3A2</i>   | <i>SERINC2</i>  | <i>PDLIM1</i>   | <i>CD24</i>     | <i>IVNS1ABP</i>  | <i>FTH1</i>         | <i>NDUFA4L2</i> | <i>MFAP2</i>     | <i>SLC20A1</i> |
| <i>GJB2</i>    | <i>APP</i>      | <i>LOX</i>      | <i>MT1X</i>     | <i>SLC16A3</i>  | <i>WFDC2</i>     | <i>TNFRSF6B</i>     | <i>SULF2</i>    | <i>FCGRT</i>     | <i>RNF25</i>   |
| <i>PLD3</i>    | <i>DNPH1</i>    | <i>MMP28</i>    | <i>TCIRG1</i>   | <i>CTSH</i>     | <i>MMP13</i>     | <i>IGFL1</i>        | <i>CCDC115</i>  | <i>GAMT</i>      | <i>BPGM</i>    |
| <i>PLEKHA1</i> | <i>SGK1</i>     | <i>CRABP2</i>   | <i>ANXA4</i>    | <i>TPST1</i>    | <i>GLTSCR2</i>   | <i>KRT14</i>        | <i>SDC2</i>     | <i>TMEM14C</i>   | <i>GJB6</i>    |
| <i>PIK3IP1</i> | <i>TLR2</i>     | <i>TNFSF10</i>  | <i>PLAU</i>     | <i>GSN</i>      | <i>WDR91</i>     | <i>ALDH2</i>        | <i>EXT2</i>     | <i>SPHK1</i>     | <i>IFI30</i>   |
| <i>NINJ1</i>   | <i>SLC39A14</i> | <i>FTSJ1</i>    | <i>ATP1B1</i>   | <i>COL7A1</i>   | <i>BMP1</i>      | <i>RTKN</i>         | <i>PTK2</i>     | <i>CTNNA1</i>    | <i>PLS3</i>    |
| <i>ECH1</i>    | <i>BECN1</i>    | <i>THBS1</i>    | <i>PSMD13</i>   | <i>SMARCA1</i>  | <i>PDCL3</i>     | <i>LEMD1</i>        | <i>ACTR3</i>    | <i>VAMP3</i>     | <i>SOD2</i>    |
| <i>HSPA5</i>   | <i>GALNT3</i>   | <i>SERPINB5</i> | <i>DDX47</i>    | <i>NANS</i>     | <i>TVP23B</i>    | <i>ADAM9</i>        | <i>TM9SF2</i>   | <i>PAFAH1B2</i>  | <i>TPM1</i>    |
| <i>EFNA5</i>   | <i>KLF7</i>     | <i>TP63</i>     | <i>SF3A3</i>    | <i>CCL20</i>    | <i>CMTM6</i>     | <i>WDR18</i>        | <i>USP10</i>    | <i>CLIC4</i>     | <i>TOR1A</i>   |
| <i>GMPPA</i>   | <i>RPL21P28</i> | <i>SERPINE1</i> | <i>TRIM16</i>   | <i>RBP1</i>     | <i>NDRG1</i>     |                     |                 |                  |                |

---

**Supplemental Table 4. Clinical characteristics of the 249 cancer patients**

| Stomach Adenocarcinoma                               | Cases            |
|------------------------------------------------------|------------------|
| Patient Characteristics                              |                  |
| Number of patients                                   | 78               |
| Age (yr; median, range)                              | 54, 21–74        |
| Gender (male/female)                                 | 51 / 27          |
| Tumor depth (pT2/pT3)                                | 15 / 63          |
| Lymph node metastasis (pN0/pN1+pN2+pN3)              | 41 / 37          |
| Histologic classification (intestinal/diffuse/mixed) | 45 / 28 / 5      |
| Tumor size (cm; $\leq 4$ / $> 4$ )                   | 35 / 43          |
| Tumor location (higher/middle/lower/others)          | 40 / 16 / 17 / 5 |
| Borrmann type (I+II/III+IV)                          | 30 / 48          |
| Colon Adenocarcinoma                                 | Cases            |
| Patient Characteristics                              |                  |
| Number of patients                                   | 82               |
| Age (yr; median, range)                              | 52, 31-82        |
| Gender (male/female)                                 | 41 / 41          |
| Tumor stage (pT2/pT3)                                | 21 / 61          |
| Lymphatic invasion (yes/no)                          | 12 / 70          |
| Differentiation (well/moderate/poor)                 | 60 / 17 / 5      |
| Vascular emboli (yes/no)                             | 12 / 70          |
| Tumor location (right side/left side)                | 57 / 25          |
| Lung Adenocarcinoma                                  | Cases            |
| Patient Characteristics                              |                  |
| No. of patients                                      | 89               |
| Age, years (median, range)                           | 67, 42–85        |
| Gender (male/female)                                 | 49 / 40          |
| Tumor stage (I+II/III+IV)                            | 60 / 29          |
| Tumor size (cm; $\leq 3$ / $> 3$ )                   | 72/17            |
| lymphovascular invasion (yes/no)                     | 6/83             |
| pleural invasion (yes/no)                            | 20/69            |
| Tumor differentiation (well/moderate/poor)           | 20/46/23         |
| Tumor location (Left/Right/Overlapping)              | 35/53/1          |
| smoking habbit (yes/no)                              | 59/30            |

**Supplemental Table 5. Blocking effects of indicated cytokines in co-culture system by mAbs**

| <b>Treatment</b>       | <b>TNF-<math>\alpha</math> (pg/ml)</b> | <b>IL-1<math>\beta</math> (pg/ml)</b> | <b>IL-6 (pg/ml)</b> | <b>IL-12 (pg/ml)</b> | <b>TGF-<math>\beta</math> (pg/ml)</b> | <b>IFN-<math>\gamma</math> (pg/ml)</b> |
|------------------------|----------------------------------------|---------------------------------------|---------------------|----------------------|---------------------------------------|----------------------------------------|
| Untreated              | 2317 $\pm$ 212                         | 487 $\pm$ 38                          | 7254 $\pm$ 841      | 123 $\pm$ 21         | 1638 $\pm$ 224                        | 1263 $\pm$ 146                         |
| Isotype                | 2128 $\pm$ 128                         | 526 $\pm$ 28                          | 6834 $\pm$ 523      | 142 $\pm$ 12         | 1873 $\pm$ 156                        | 1337 $\pm$ 96                          |
| $\alpha$ TNF- $\alpha$ | 56 $\pm$ 4                             | 453 $\pm$ 21                          | 7072 $\pm$ 611      | 121 $\pm$ 33         | 1453 $\pm$ 278                        | 1289 $\pm$ 226                         |
| $\alpha$ IL-1 $\beta$  | 2008 $\pm$ 138                         | 38 $\pm$ 6                            | 6963 $\pm$ 712      | 102 $\pm$ 16         | 1609 $\pm$ 384                        | 1137 $\pm$ 108                         |
| $\alpha$ IL-6          | 1956 $\pm$ 216                         | 443 $\pm$ 31                          | 643 $\pm$ 55        | 118 $\pm$ 53         | 1522 $\pm$ 377                        | 1038 $\pm$ 163                         |
| $\alpha$ IL-12         | 2026 $\pm$ 316                         | 422 $\pm$ 76                          | 7121 $\pm$ 1210     | 22 $\pm$ 5           | 1367 $\pm$ 123                        | 1176 $\pm$ 253                         |
| $\alpha$ TGF- $\beta$  | 1948 $\pm$ 402                         | 398 $\pm$ 88                          | 6712 $\pm$ 938      | 132 $\pm$ 89         | 1653 $\pm$ 277                        | 988 $\pm$ 103                          |
| $\alpha$ IFN- $\gamma$ | 1895 $\pm$ 308                         | 482 $\pm$ 45                          | 6357 $\pm$ 1305     | 124 $\pm$ 73         | 167 $\pm$ 38                          | 218 $\pm$ 37                           |



**Supplemental Table 6. Antibodies used in experiments**

| Antibody                                        | Clone #    | Supplier                     |
|-------------------------------------------------|------------|------------------------------|
| immunoblotting                                  |            |                              |
| Mouse anti-human Stat1 (Tyr701)                 | 14/P-STAT1 | BD Transduction Laboratories |
| Mouse anti-human Stat1                          | 42/Stat1   | BD Transduction Laboratories |
| Mouse anti-human Stat3 (Tyr705)                 | 4/P-STAT3  | BD Transduction Laboratories |
| Mouse anti-human Stat3                          | 84/Stat3   | BD Transduction Laboratories |
| Rabbit anti-human JNK (Thr183/Tyr185)           | 98F2       | Cell Signaling Technology    |
| Rabbit anti-human JNK                           | 56G8       | Cell Signaling Technology    |
| Rabbit anti-human ERK (Thr202/Tyr204)           | 20G11      | Cell Signaling Technology    |
| Rabbit anti-human ERK                           | 137F5      | Cell Signaling Technology    |
| Rabbit anti-human P38 (Thr180/Tyr182)           | D3F9       | Cell Signaling Technology    |
| Rabbit anti-human P38                           | D13E1      | Cell Signaling Technology    |
| Rabbit anti-human AKT (Ser473)                  | D9E        | Cell Signaling Technology    |
| Rabbit anti-human AKT                           | C67E7      | Cell Signaling Technology    |
| Rabbit anti-human I $\kappa$ B (Ser32)          | 14D4       | Cell Signaling Technology    |
| Rabbit anti-human P65 (Ser536)                  | 93H1       | Cell Signaling Technology    |
| Rabbit anti-human P65                           | D14E12     | Cell Signaling Technology    |
| Rabbit anti-human Mcl1                          | D35A5      | Cell Signaling Technology    |
| Mouse anti-human Bcl-xl                         | 44/Bcl-x   | BD Transduction Laboratories |
| Mouse anti-human Bcl2                           | 7/Bcl-2    | BD Transduction Laboratories |
| Mouse anti-human BID                            | 7/Bid      | BD Transduction Laboratories |
| Mouse anti-human BAX                            | 3/Bax      | BD Transduction Laboratories |
| Mouse anti-human GAPDH                          | 2D9        | Origene                      |
| neutralizing                                    |            |                              |
| Human TNF- $\alpha$ Antibody                    | 28401      | R&D system                   |
| Human IL-1 $\beta$ Antibody                     | 8516       | R&D system                   |
| Human IL-6 Antibody                             | 6708       | R&D system                   |
| Human IL-12 Antibody                            | 24910      | R&D system                   |
| Human TGF- $\beta$ Antibody                     | 9016       | R&D system                   |
| Human IFN- $\gamma$ Antibody                    | 25718      | R&D system                   |
| mouse experiments                               |            |                              |
| anti-mouse CD3 $\epsilon$                       | 145-2C11   | Bio X Cell                   |
| anti-mouse CSF1R                                | AFS98      | Bio X Cell                   |
| anti-mouse PD-L1                                | 10F.9G2    | Bio X Cell                   |
| flow cytometry                                  |            |                              |
| Alexa Fluor 700-conjugated anti-human CD3       | OKT3       | ebioscience                  |
| APC-conjugated anti-human CD56                  | TULY56     | ebioscience                  |
| eFluor 450-conjugated anti-human CD15           | MMA        | ebioscience                  |
| FITC-conjugated anti-human CD14                 | RMO52      | Beckman Coulter              |
| PE-conjugated anti-human PD-L1                  | MIH1       | ebioscience                  |
| PE-Cy7-conjugated anti-human CD19               | J4.119     | Beckman Coulter              |
| Krome Orange anti-human CD45                    | J33        | Beckman Coulter              |
| APC-conjugated anti-mouse F4/80                 | BM8        | Biologend                    |
| Brilliant Violet 570-conjugated anti-mouse CD45 | 30-F11     | Biologend                    |

---

|                                       |         |             |
|---------------------------------------|---------|-------------|
| eFluor 450-conjugated anti-mouse CD8a | 53-6.7  | eBioscience |
| FITC-conjugated anti-mouse CD107a     | 1D4B    | ebioscience |
| PE-conjugated anti-mouse CD3          | 17A2    | Biolegend   |
| PE-Cy7-conjugated anti-mouse CD274    | 10F.9G2 | Biolegend   |

---

Suppliers: BD Transduction Laboratories (San Diego, CA); Cell Signaling Technology (Beverly, MA); Origene (Rockville, MD); R&D system (Minneapolis, MN); Bio X Cell (West Lebanon, NH); ebioscience (Waltham, MA); Beckman Coulter (Brea, CA); Biolegend (San Diego, CA).

**Supplemental Table 7. Primers for real-time PCR**

| <b>Gene</b>        |         | <b>Sequences</b>               |
|--------------------|---------|--------------------------------|
| Human <i>CDH1</i>  | Forward | CCG CTG GCG TCT GTA GGA AGG    |
|                    | Reverse | GGC TCT TTG ACC ACC GCT CTC C  |
| Human <i>VIM</i>   | Forward | GAG AAC TTT GCC GTT GAA GC     |
|                    | Reverse | TCC AGC AGC TTC CTG TAG GT     |
| Human <i>CD274</i> | Forward | CCA CCA CCA ATT CCA AGA GAG A  |
|                    | Reverse | GGC TCC CAG AAT TAC CAA GTG A  |
| Human <i>SNAI1</i> | Forward | GGA TCT CCA GGC TCG AAA GG     |
|                    | Reverse | GAC ATT CGG GAG AAG GTC CG     |
| Human <i>SNAI2</i> | Forward | TGT GTG GAC TAC CGC TGC TC     |
|                    | Reverse | GAG AGG CCA TTG GGT AGC TG     |
| Human <i>GAPDH</i> | Forward | GAG TCA ACG GAT TTG GTC GT     |
|                    | Reverse | GAC AAG CTT CCC GTT CTC AG     |
| Mouse <i>CD274</i> | Forward | TGC TGC ATA ATC AGC TAC GG     |
|                    | Reverse | GCT GGT CAC ATT GAG AAG CA     |
| Mouse <i>GAPDH</i> | Forward | AAA TGG TGA AGG TCG GTG TGA AC |
|                    | Reverse | CAA CAA TCT CCA CTT TGC CAC TG |
